# Supplementary material
Source: PubMed Central journal article supplement (PMC419663)

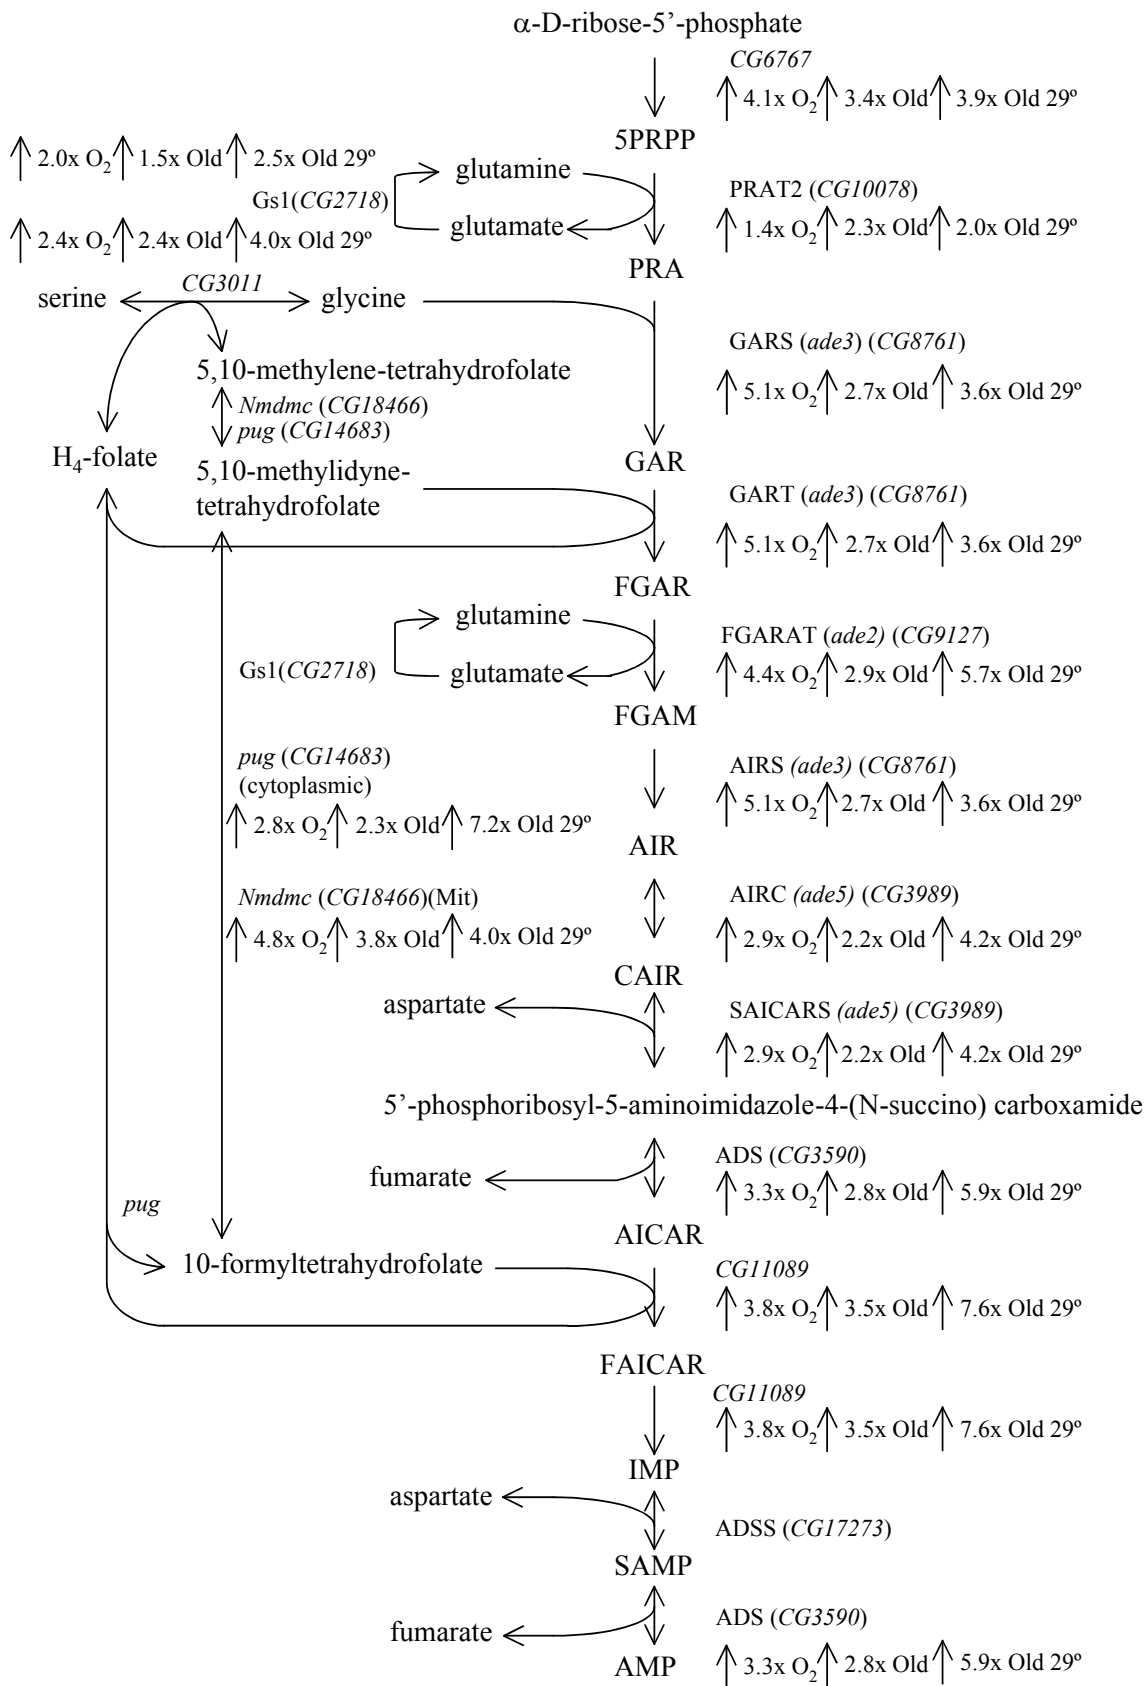

Supplement: pnas_101_20_7663__12.pdf [file pnas_101_20_7663__12.pdf]

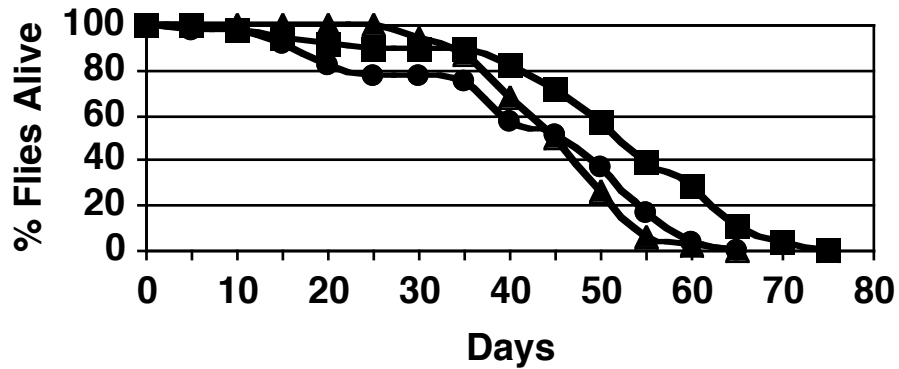

■ No Treatment ● CO2 Only ▲ Light + CO2

Supplement: pnas_101_20_7663__13.pdf [file pnas_101_20_7663__13.pdf]

### Or-R/rtTA(3)E2

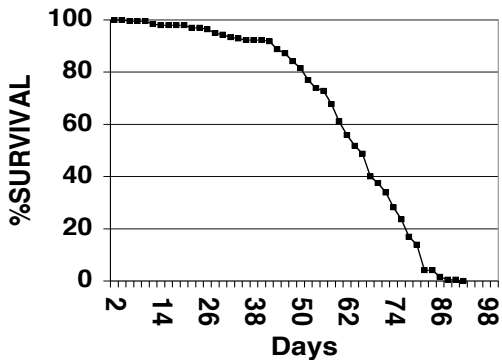

Supplement: pnas_101_20_7663__14.pdf [file pnas_101_20_7663__14.pdf]
